# Supplementary material for: N-doped carbon dots from phenol derivatives for excellent colour rendering WLEDs
Source: PubMed Central journal article supplement (PMC9077792; doi:10.1039/c7ra12522d), 2018-01-26
Supplement: RA-008-C7RA12522D-s001.pdf [file RA-008-C7RA12522D-s001.pdf]

## Supporting Information

### N-Doped carbon dots from phenol derivatives for excellent colour rendering WLEDs

Qian Liu <sup>a</sup>, Danting Li <sup>a</sup>, Zhifeng Zhu <sup>a</sup>, Shimeng Yu <sup>a</sup>, Yan Zhang <sup>a</sup>, Dabin Yu <sup>b,\*</sup>, and Yang Jiang <sup>a,\*</sup>

<sup>a</sup> School of Materials Science and Engineering, Hefei University of Technology, Hefei 230009, P. R. China; cathyliuq@163.com(Q.L.); wlkd1106t@163.com(D.L.); zhuzhifeng@hfut.edu.cn(Z.Z.); yushimenglxl@163.com (S.Y.); yanzi813@163.com (Y.Z.)

<sup>b</sup> State Key Laboratory of Pulsed Power Laser Technology, National University of Defense Technology, Hefei 230037, P. R. China;

\* Corresponding authors: apjiang@hfut.edu.cn. (Y. J.), dbyu@ustc.edu(D. Y.).

### Figures

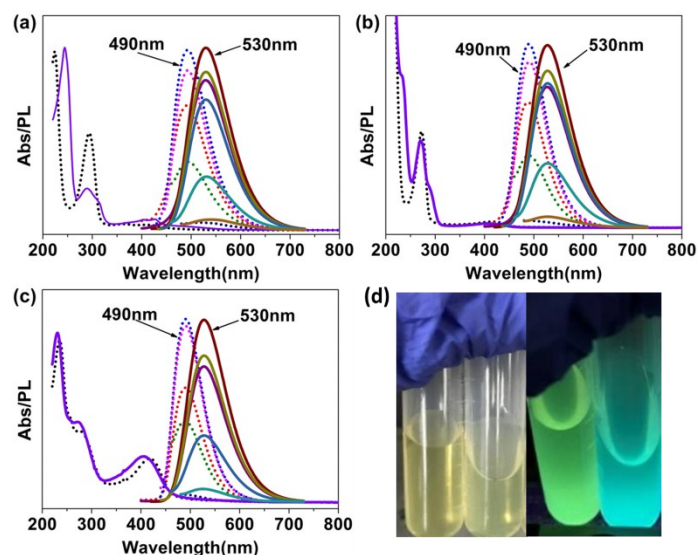

**Fig. S1** Absorption and photoluminescence emission spectra of H-CDs(a), P-CDs(b) and R-CDs(c) in solvent of water(solid line) and ethanol(dash line) under excitation light of different wavelengths (the inset legends); True color of CDs in daylight and under UV light(365nm)

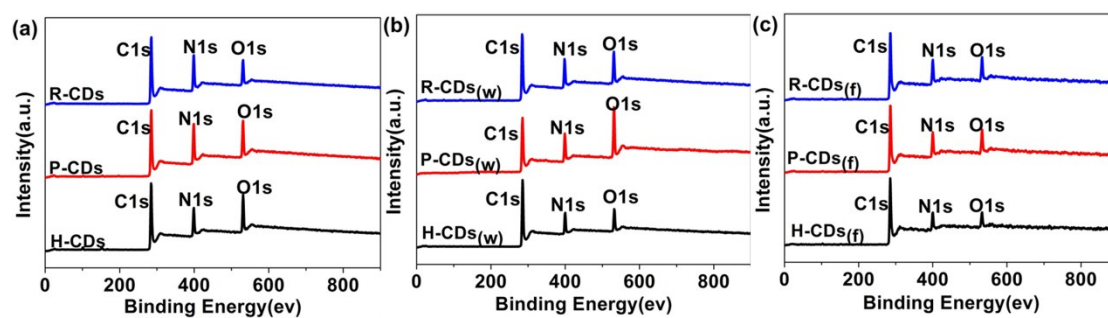

**Fig. S2** XPS spectra of the raw CDs(a), W-CDs(b) and F-CDs(c)

## Tables

**Table S1** Percentages of N atoms in CDs roughly estimated by the results of XPS

|         | H-CDs  | P-CDs | R-CDs |
|---------|--------|-------|-------|
| Raw CDs | 15.45% | 21.4% | 22.6% |
| W-CDs   | 12.8%  | 16.4% | 16.9% |
| F-CDs   | 11.4%  | 15.3% | 15.8% |
